# Supplementary material
Source: HighWire-hosted journal article supplement (https://jnm.snmjournals.org/highwire/filestream/94542/field_highwire_adjunct_files/0/129577_Supplemental_Data.pdf)
Supplement: 129577_Supplemental_Data.pdf [file 129577_Supplemental_Data.pdf]

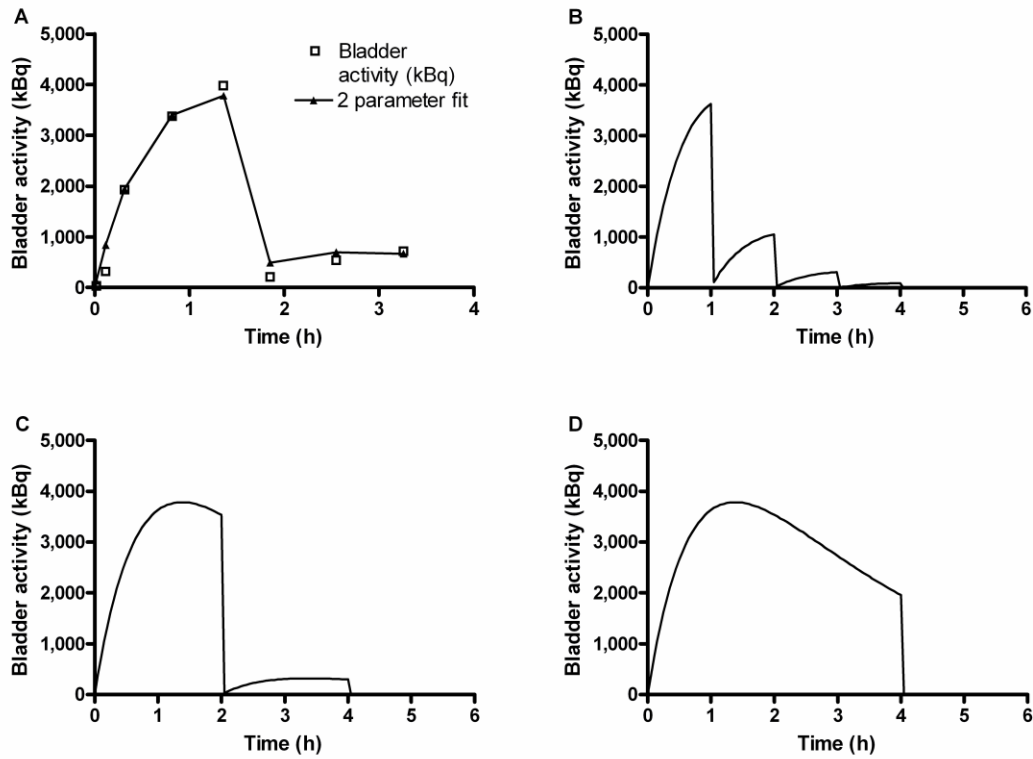

**SUPPLEMENTAL FIGURE 1:** Representative bladder fits for a subject. **(A)** The measured image and urine sample-derived time activity curves (TACs) for one subject and the fitted function Eq. 2 (both shown uncorrected for radioactive decay). The fitted functions extrapolated to the following voiding scenarios: complete bladder voids **(B)** every hour, **(C)** every 2 hours, and **(D)** every 4 hours post tracer administration.

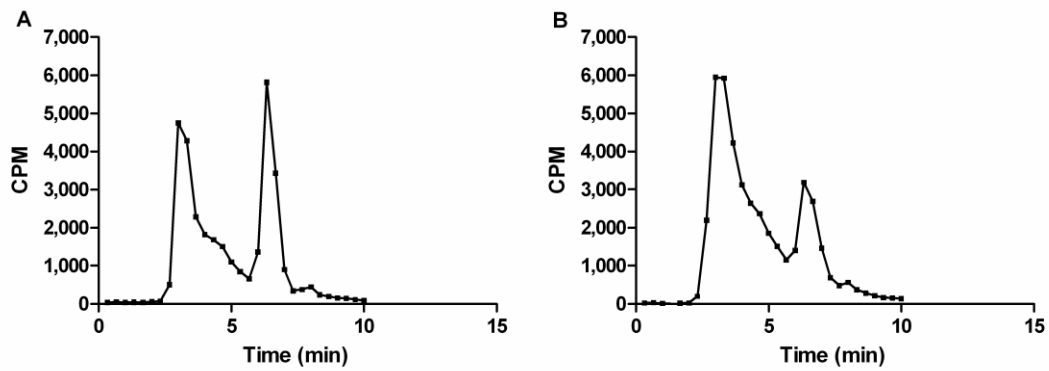

**SUPPLEMENTAL FIGURE 2:** Typical high-performance liquid chromatography (HPLC) chromatogram of  $^{18}\text{F}$ -D4-FCH and its metabolite  $^{18}\text{F}$ -D4-betaine in urine. Analysis of the metabolism of  $^{18}\text{F}$ -D4-FCH at **(A)** 90 min, **(B)** 240 min post tracer injection, shows predominant excretion of  $^{18}\text{F}$ -D4-betaine.

**SUPPLEMENTAL TABLE 1:** Comparison between  $^{18}\text{F}$ -D4-FCH,  $^{11}\text{C}$ -choline and  $^{18}\text{F}$ -FCH

|                                                   | $^{11}\text{C}$ -Choline *<br>(1) | $^{11}\text{C}$ -Choline†<br>(2) | $^{18}\text{F}$ -FCH*<br>(21) | $^{18}\text{F}$ -D4-FCH†<br>(this study) |
|---------------------------------------------------|-----------------------------------|----------------------------------|-------------------------------|------------------------------------------|
| <b>Absorbed dose (mGy/ MBq)</b>                   |                                   |                                  |                               |                                          |
| Kidney                                            | 0.018                             | 0.021                            | 0.16                          | 0.106                                    |
| Liver                                             | 0.017                             | 0.02                             | 0.061                         | 0.094                                    |
| Pancreas                                          | 0.013                             | 0.029                            |                               | 0.066                                    |
| Urinary Bladder                                   |                                   | 0.003                            | 0.065                         | 0.047                                    |
| Adrenals                                          |                                   | 0.004                            |                               | 0.046                                    |
| Stomach wall                                      |                                   | 0.006                            |                               | 0.04                                     |
| Spleen                                            | 0.008                             | 0.009                            | 0.055                         | 0.038                                    |
| <b>ED (mSv/ MBq)</b>                              | 0.0028                            | 0.0044‡                          | 0.020‡                        | 0.025‡                                   |
| <b>Urinary Excretion (% of injected activity)</b> |                                   | 2% in 1.5 h                      | 3.4% in 1 h                   | 4% in 1h, 6% in 2h,<br>7% in 4h          |

\*Estimated using MIRDOSE

†Estimated using OLINDA/EXM

‡The higher radiation dose of  $^{18}\text{F}$ -FCH compared to that of  $^{11}\text{C}$ -choline is due to the longer half life of  $^{18}\text{F}$

## References

1. Hara T. <sup>11</sup>C-choline and 2-deoxy-2-[<sup>18</sup>F]fluoro-D-glucose in tumor imaging with positron emission tomography. *Mol Imaging Biol.* 2002;4:267-273.
  
2. Tolvanen T, Yli-Kerttula T, Ujula T, et al. Biodistribution and radiation dosimetry of [(11)C]choline: a comparison between rat and human data. *Eur J Nucl Med Mol Imaging.* 2010;37:874-883.
  
21. DeGrado TR, Reiman RE, Price DT, Wang S, Coleman RE. Pharmacokinetics and radiation dosimetry of <sup>18</sup>F-fluorocholine. *J Nucl Med.* 2002;43:92-96.
